# Supplementary material for: Arabidopsis Plants Sense Non-self Peptides to Promote Resistance Against Plectosphaerella cucumerina
Source: PubMed Central journal article supplement (PMC7225342; doi:10.3389/fpls.2020.00529), 2020-05-08
Supplement: Data_Sheet_1.pdf [file Data_Sheet_1.pdf]

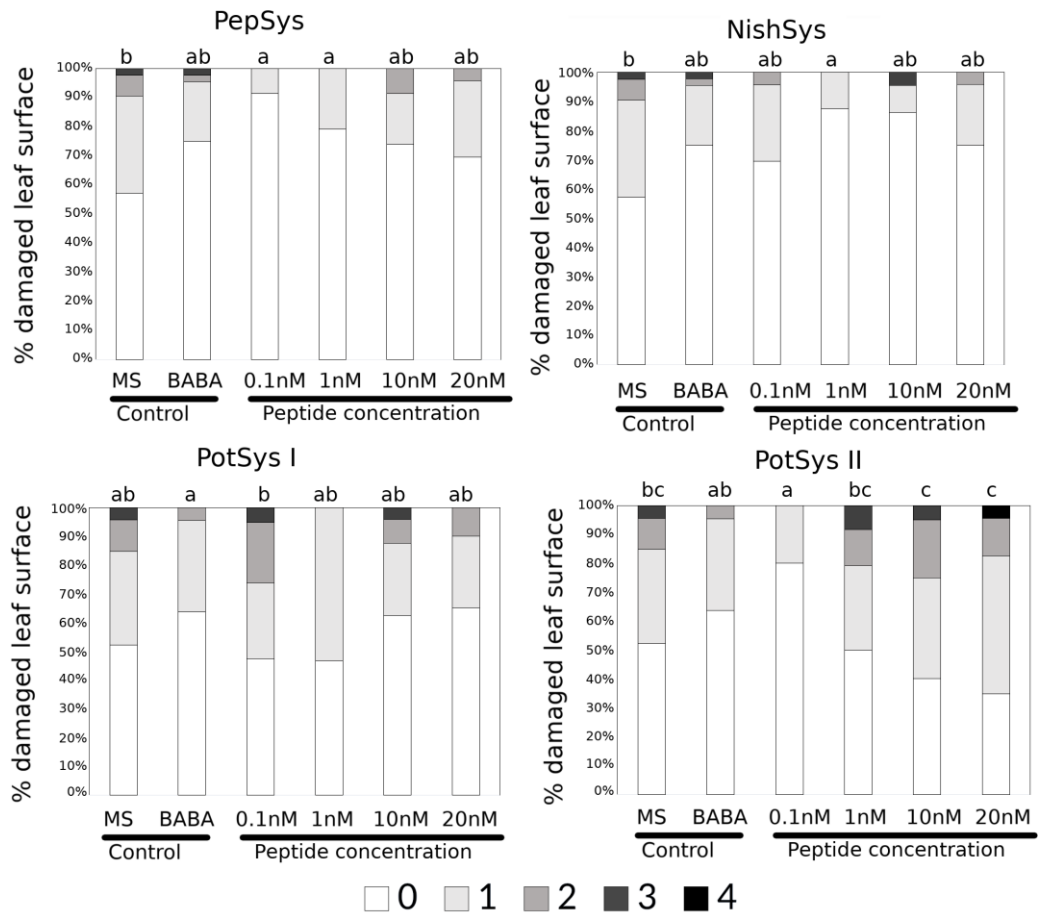

Figure S1

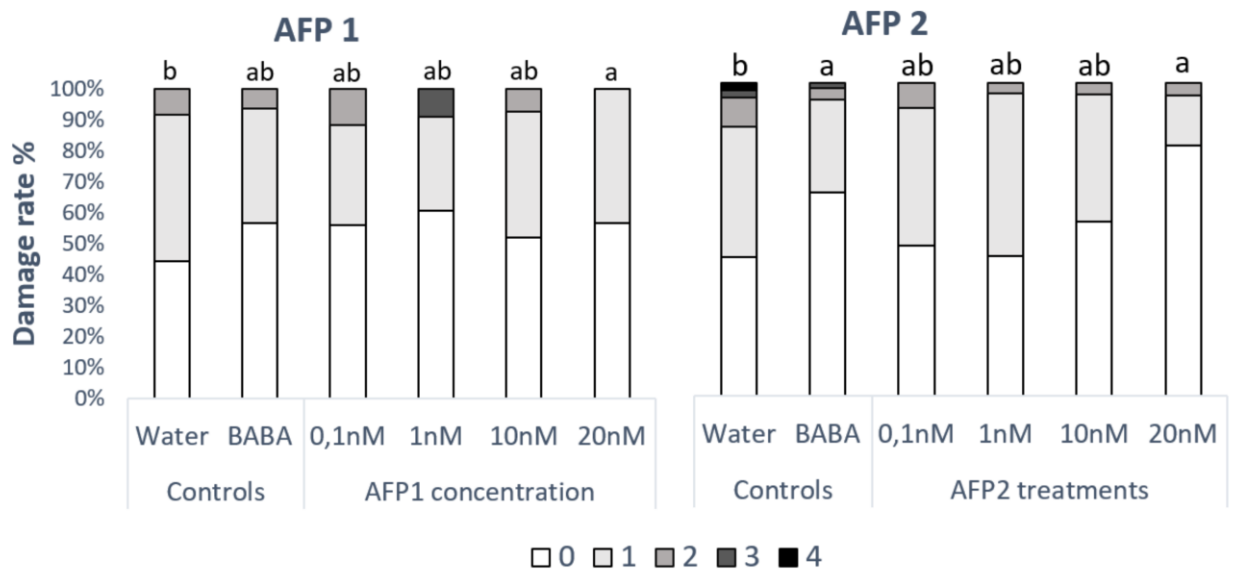

Figure S2

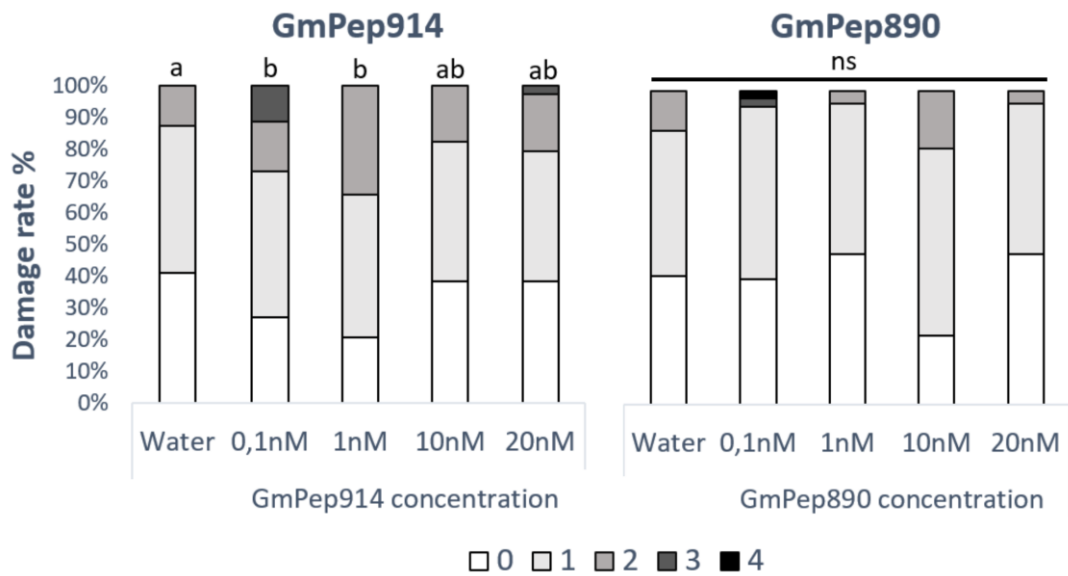

Figure S3
